# Supplementary material
Source: PubMed Central journal article supplement (PMC4163646)
Supplement: supp_127.18.4037_JCS151944.pdf [file supp_127.18.4037_JCS151944.pdf]

**Figure S1 – P120 catenin (and ARVCF) associates with REST/CoREST.**

**A.** Bacterial MBP, MBP-ARVCF, GST-CoREST, and REST were purified conventionally. GST was cleaved from GST-REST using thrombin. The indicated proteins were co-incubated, and MBP or MBP-ARVCF precipitated using amylose beads, followed by immunoblotting.

**B.** P120-catenin associates with REST in HEK293 cells. P120-flag and REST-HA were transiently co-expressed in HEK293 cells. Forty-eight hrs post transfection, cells were lysed, and REST-HA precipitated, followed by immunoblotting for p120-flag.

**C.** P120-catenin associates with CoREST in pluripotent mESCs. Endogenous CoREST was precipitated, with REST and p120 co-precipitating from nuclear-fractionated pluripotent mESCs. mESCs were differentiated via retinoic acid addition for 2 days after embryoid body formation (Note: Plu.=pluripotent ESCs; Dif.= differentiating mESCs).

**D.** Endogenous p120 associates with endogenous REST and CoREST in HEK293 cells. Using nuclear extracts, CoREST or REST proteins were precipitated and p120 was detected by immuno-blotting.

**E.** Kaiso does not associate with REST. The indicated proteins were overexpressed in AB1 cells using liposome-mediated transfection. 48hrs post transfection, whole cell lysates were used and REST was precipitated by anti-HA antibody, followed by immunoblotting with anti-CoREST or anti-Kaiso antibodies.

**F.** P120 colocalizes with CoREST and REST in AB1 cells. 24hrs post transfection of the indicated cDNA expressing vectors, cells were fixed with 4% formaldehyde, and incubated with 0.3% TritonX100 to improve antibody permeability. Anti-HA and anti-myc antibodies were used for immuno-staining, and DAPI was used for counter-staining. Scale bar represents 30µm.

**Figure S2 – P120 can form a trimetric complex with REST/ CoREST, and p120 promotes REST protein destabilization, likely through a proteasome-dependent mechanism.**

**A.** CoREST:p120-catenin binding domain mapping. The indicated protein fragments of CoREST were expressed using an in vitro transcription and translation system, as indicated in Figure 2B, where the results for constructs #1 and #5 are displayed. The

CoREST-myc and flag-p120-HA proteins were incubated together, and CoREST-myc or flag-p120-HA was precipitated.

**B.** The indicated proteins were expressed using an in vitro transcription and translation system. REST $\Delta$ C represents a carboxyl-terminal deleted mutant of REST (1-983 amino acids) in which the putative CoREST binding region is removed. CoREST-myc was precipitated by anti-myc antibody.

**C.** The indicated protein expressing constructs were transfected using lipofectamine2000 into AB1 cells and 48hrs post transfection, MG132 was added at 5 $\mu$ M final concentration for 2hrs. REST and p120 proteins were detected by immunoblotting using anti-HA and anti-myc antibodies, respectively.

**Figure S3 - P120 modulates REST/CoREST gene targets in different contexts, as shown in mouse ESCs, NIH3T3 cells and in *Xenopus laevis* embryos.**

**A.** REST/CoREST gene targets in AB1 mESCs are repressed upon depletion of p120 by either of two independent shRNAs. P120 knockdown was confirmed by immuno-blotting, and the level of REST target transcripts was assessed by real-time PCR. GAPDH was used as an internal control. Error bars represent SD.

**B.** Non-targetable p120 expression rescues p120 depletion effect on REST gene targets. Non-targetable p120 cDNA (lacking UTR region) plasmid was transfected to shRNA-mediated control and p120 depleted AB1 cells. 48hrs after incubation, cells were harvested and the indicated REST gene targets were tested by real-time PCR. Transcripts were normalized to GAPDH. Error bars represent SD.

**C.** P120 knockdown decreases known REST/CoREST gene targets in NIH3T3 cells. P120-depleted NIH3T3 cells were generated by shRNA-mediated RNAi. Whole cell lysates were used for immunoblotting. The REST/CoREST gene target transcripts (mash1 and syt4) were tested by semi-qRT-PCR. GAPDH was used as an internal control.

**D.** CoREST knockdown rescues p120 depletion effects. CoREST was knocked down by siRNA in p120-depleted NIH3T3 cells, and p120 was expressed after liposome-mediated transfection in p120-depleted NIH3T3 cells. Seventy-two hrs later, the indicated transcript levels were measured by semi-qRT-PCR. Mash1 and syt4 transcripts were

normalized by GAPDH and quantified relative to parental values. Whole cell lysates were used for immunoblotting to confirm CoREST knockdown.

**E.** CoREST expression rescues p120 overexpression effects. P120 was co-expressed with CoREST or REST in NIH3T3 cells for 48 hrs, and cells were lysed for immunoblotting or RT-PCR. Mash1 and syt4 transcripts were normalized to GAPDH and quantified relative to parental values.

**F.** P120 mutant (N478A), unable to bind E-cadherin, remains capable of partially rescuing REST/CoREST gene targets in p120 depleted AB1 cells. P120 (wild-type and N478A) cDNAs were transfected into shP120 AB1 cells, and 48hrs post-transfection, cells were harvested to measure the transcript levels of REST/CoREST gene targets via real-time PCR. MiR124 and miR132 transcripts were normalized to GAPDH and error bars represent SD.

**G.** P120 knockdown leads to increased repression of REST/CoREST gene targets in *Xenopus laevis* embryos. We micro-injected 10 ng of morpholino antisense-oligonucleotide directed against xp120-catenin (p120MO) or standard-control morpholino (ConMO) into both embryonic cells at the 2-cell stage and harvested the cells at the gastrula stage (stage 11). *Xenopus calbindin* and *Xenopus mash1* transcripts were measured by RT-PCR, and *Xenopus histone H4* was used as an internal control.

**Figure S4 - P120 modulates the neuronal differentiation (retinoic acid promoted) of mESCs.**

**A and B.** We used a standard retinoic acid (RA) mediated neuronal differentiation method. In brief, p120-depleted and control-depleted mESCs were plated on bacterial culture dishes in differentiation media (DMEM with 10% FBS, not including LIF and beta-mercaptoethanol). Four days later, embryoid bodies that had formed were incubated with RA for an additional 2 days before being harvested. The neural stem/progenitor markers (sox1 and nestin) (A) and the transcripts of three REST/CoREST gene-targets (calbindin, mash1, and miR-124) (B) were measured using real-time PCR. All transcripts were normalized to GAPDH. (Note: RA0 = 4-day-old embryoid bodies; RA2 = 4-day-old embryoid bodies + 2-days RA treatment)

**Figure S1**

**A**

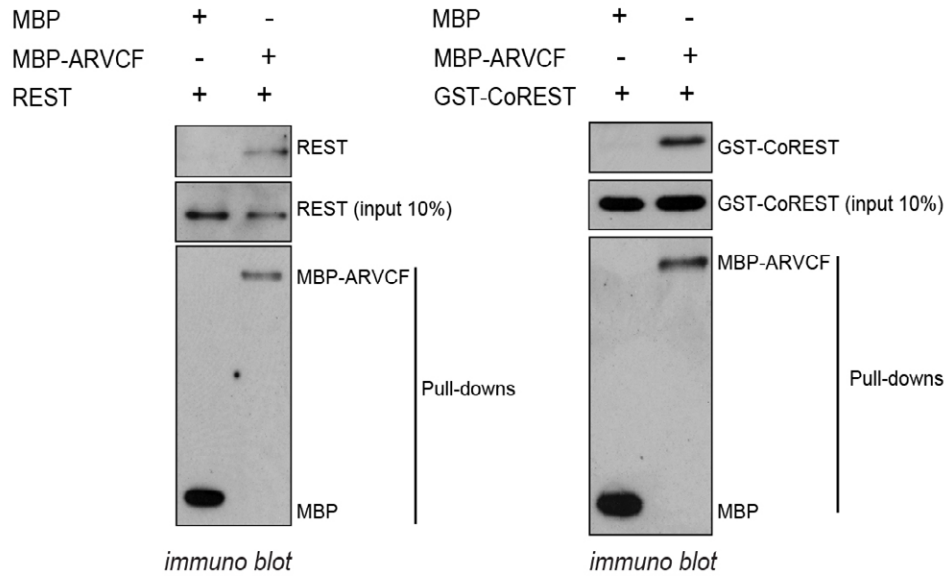

**B**

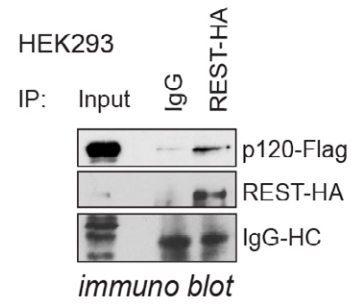

**C**

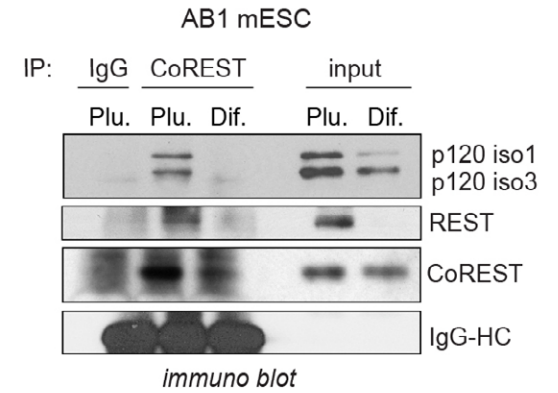

**D**

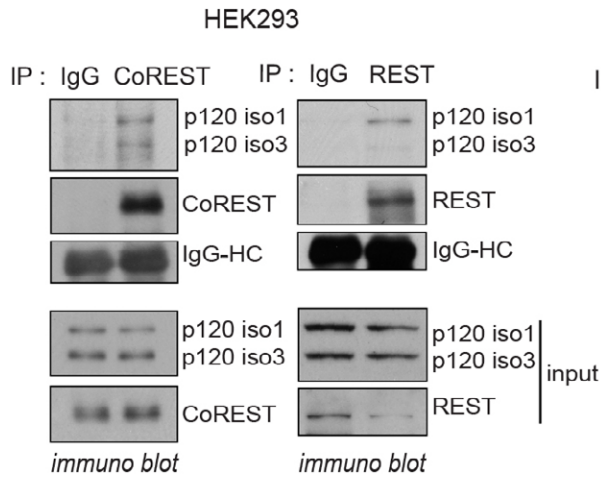

**E**

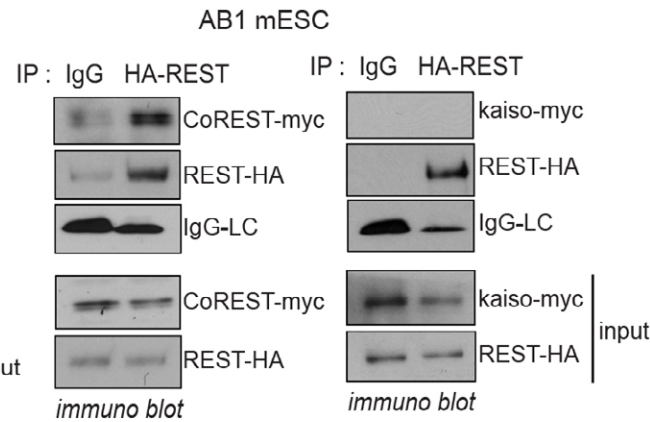

**F**

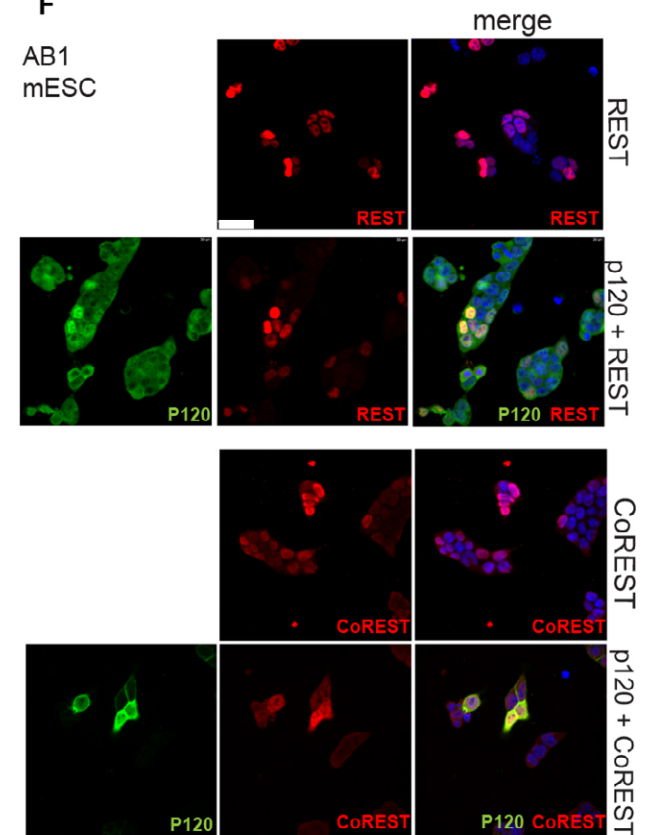

Figure S2. P120-catenin associates with REST and CoREST

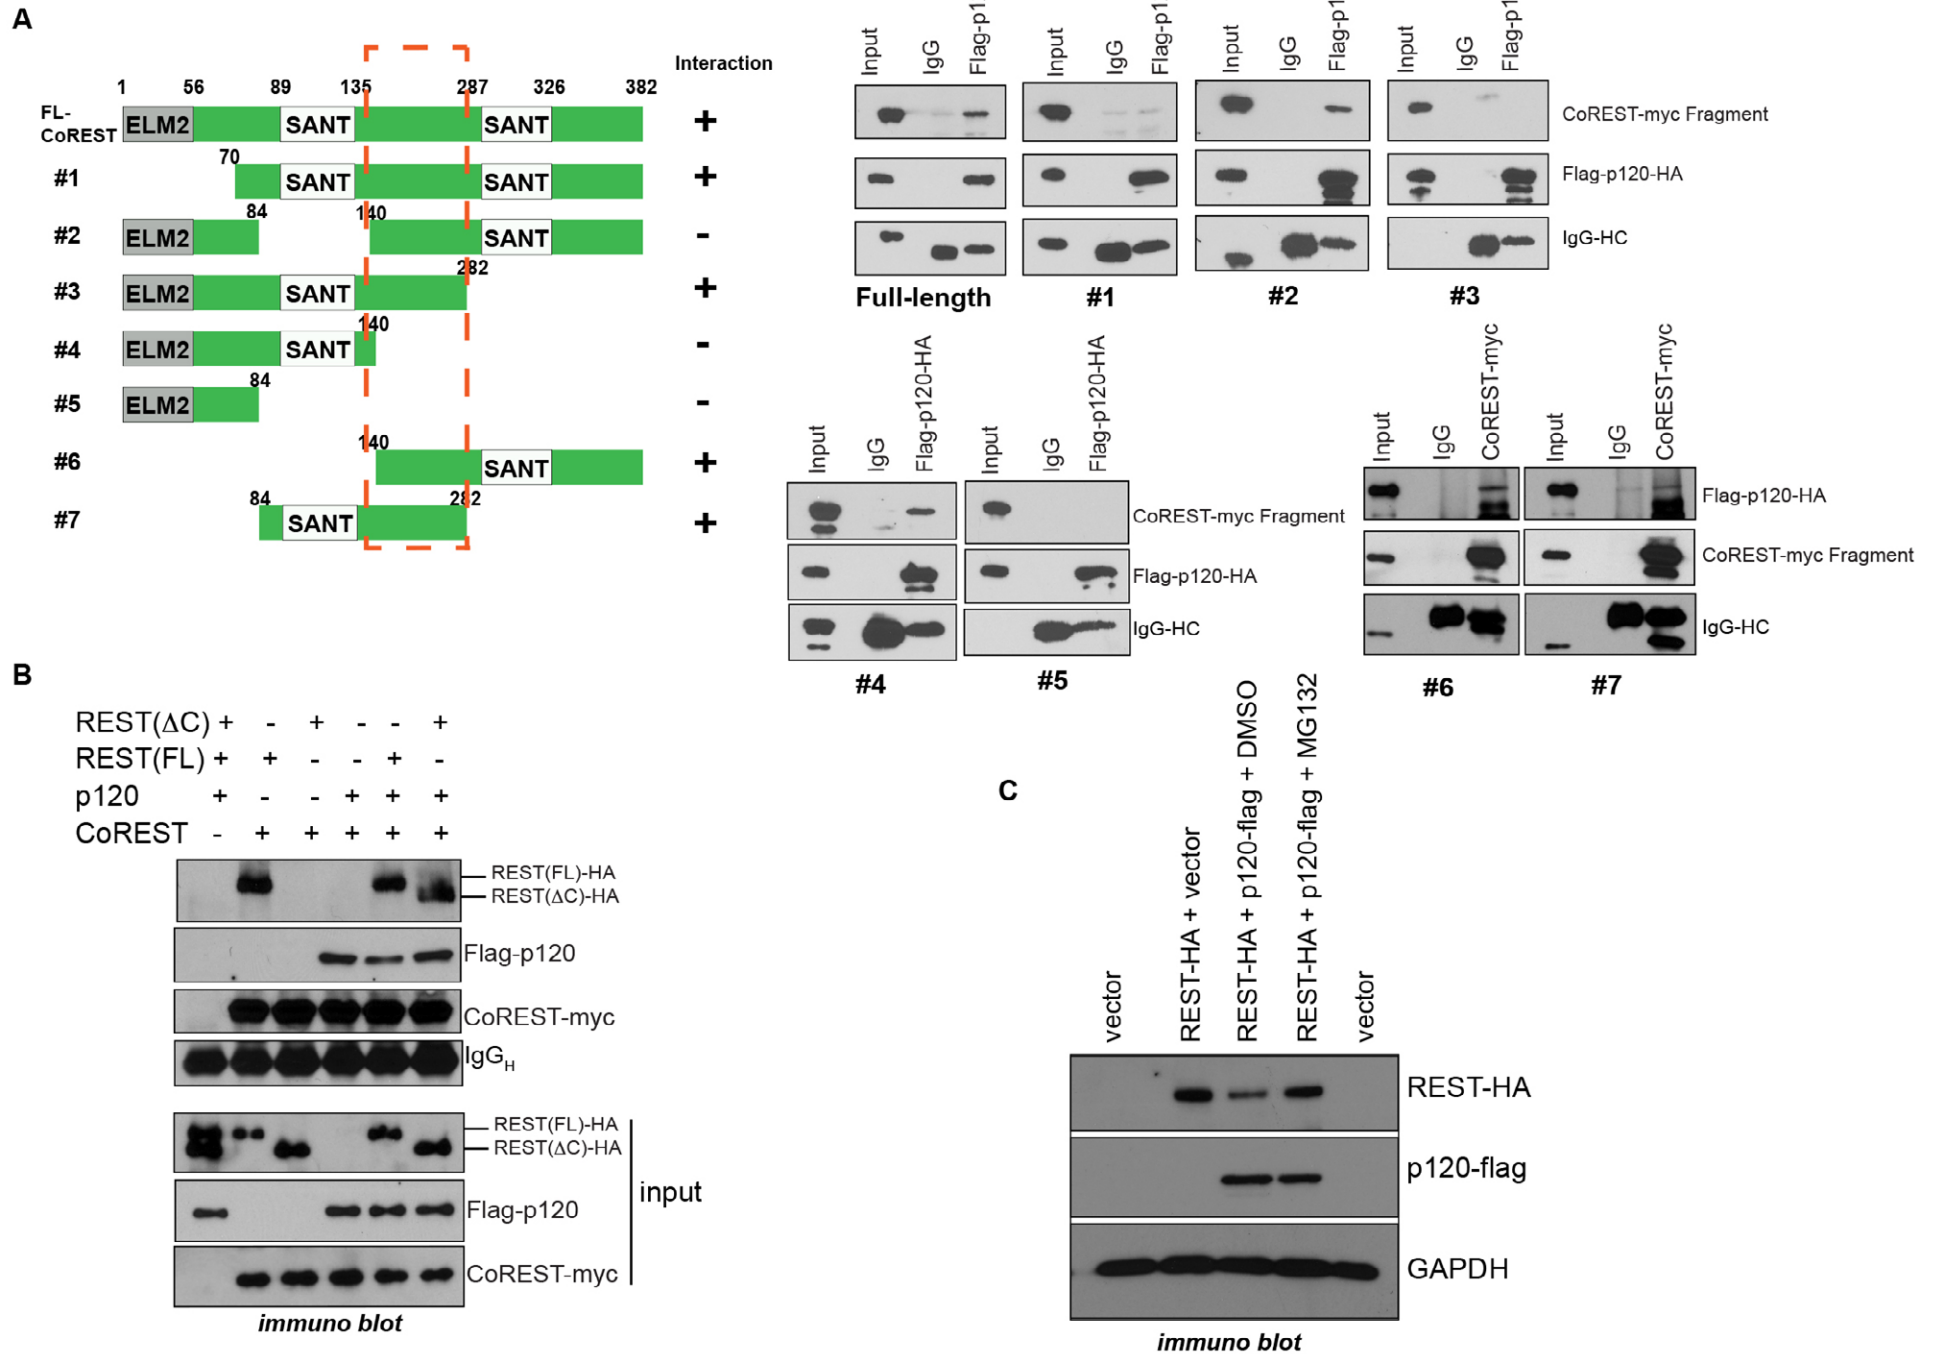

**Figure S3**

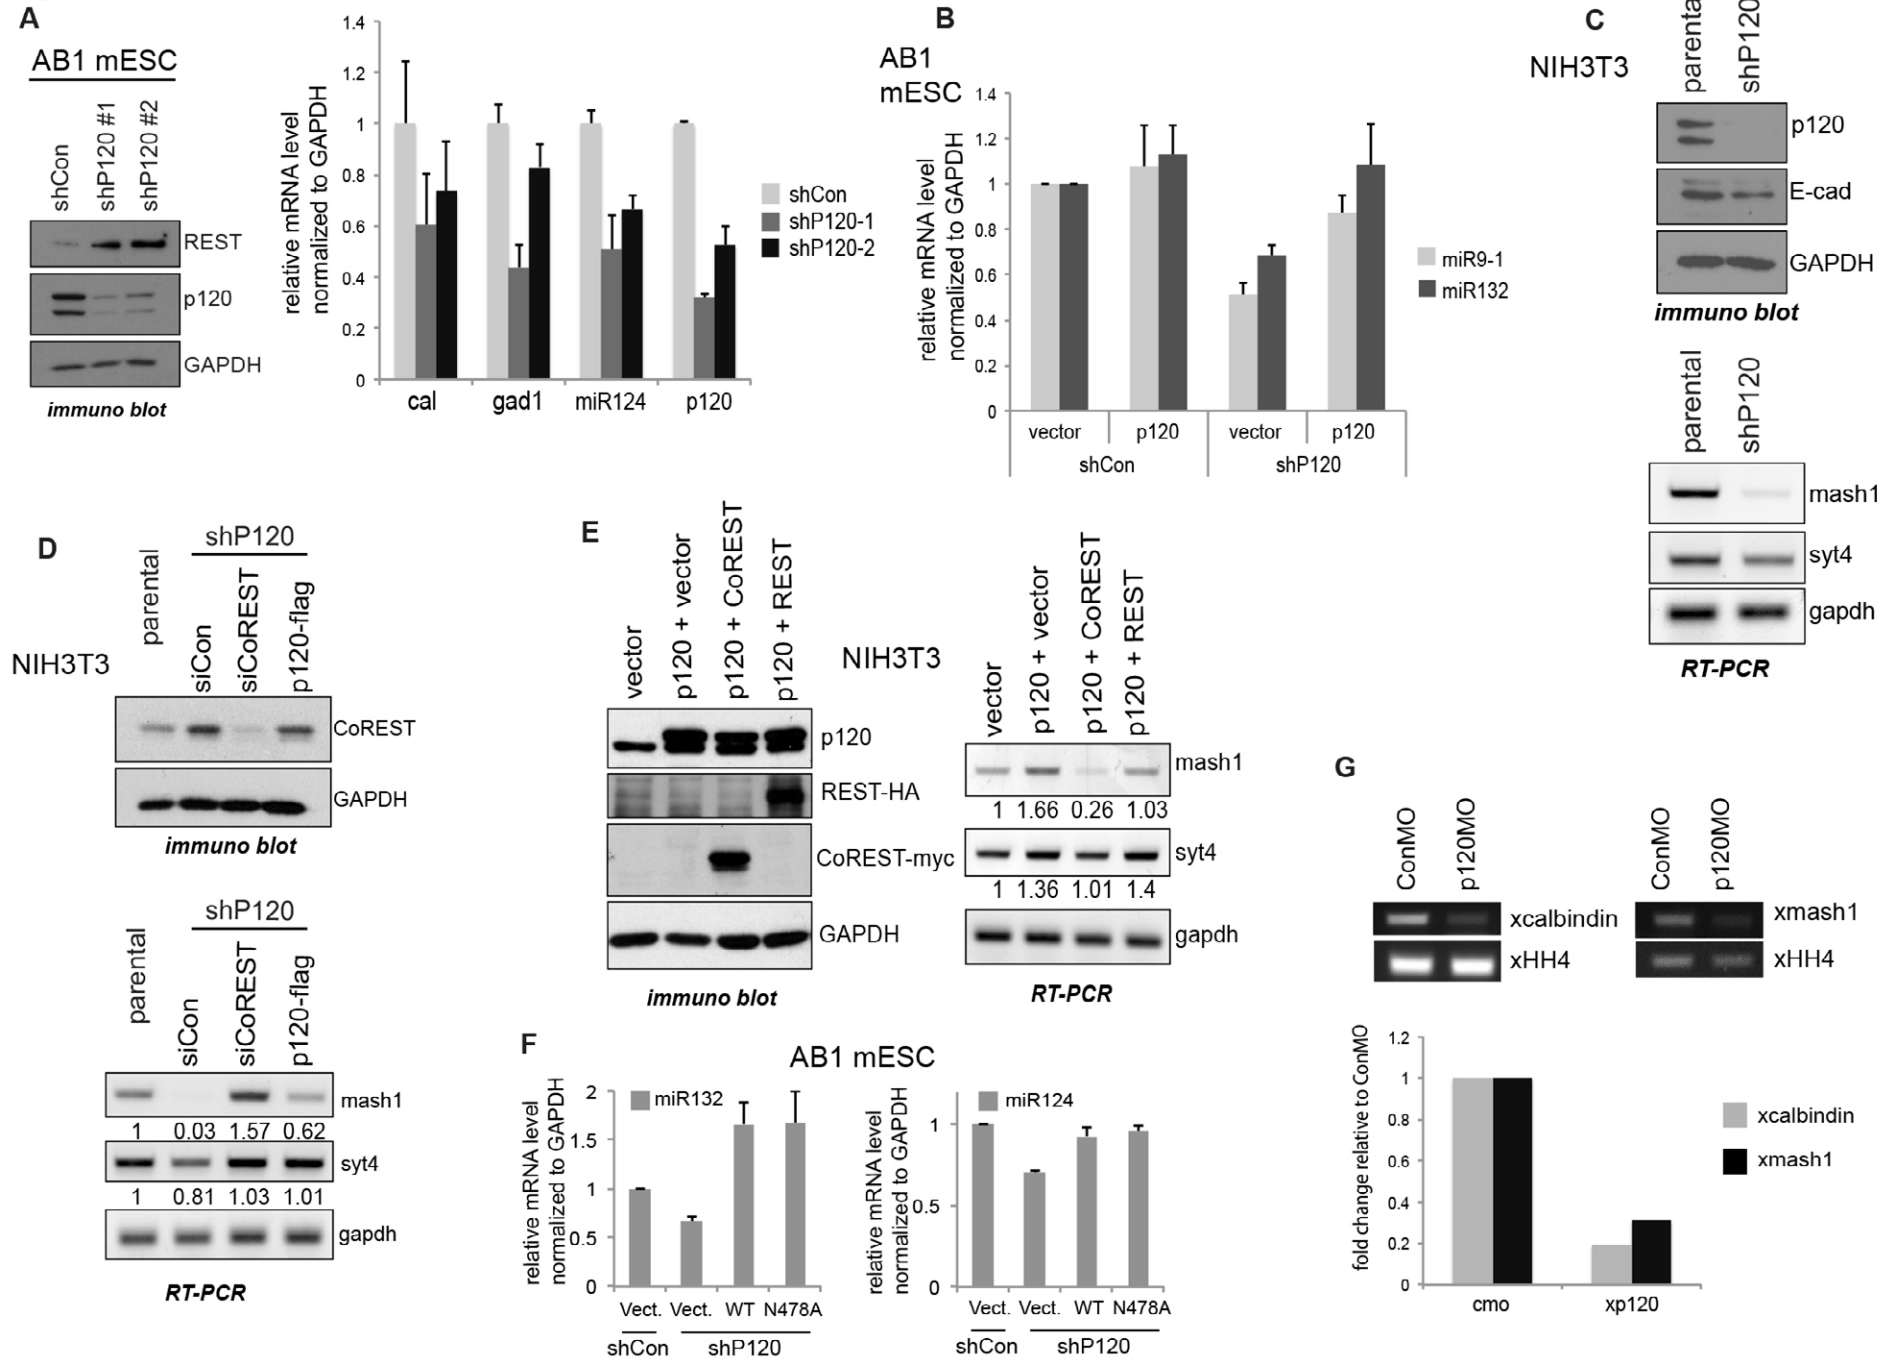

**Figure S4**

**A**

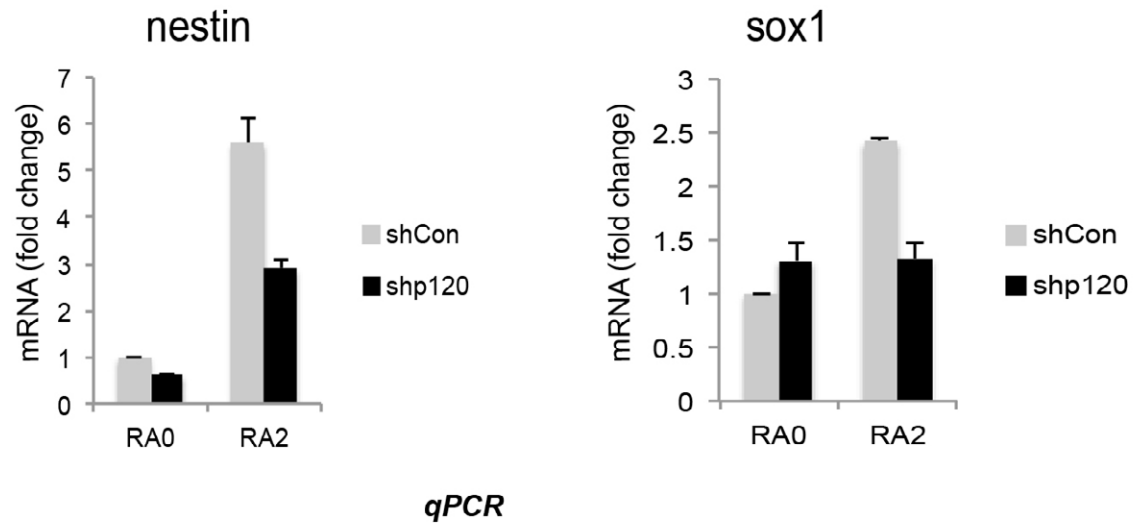

**B**

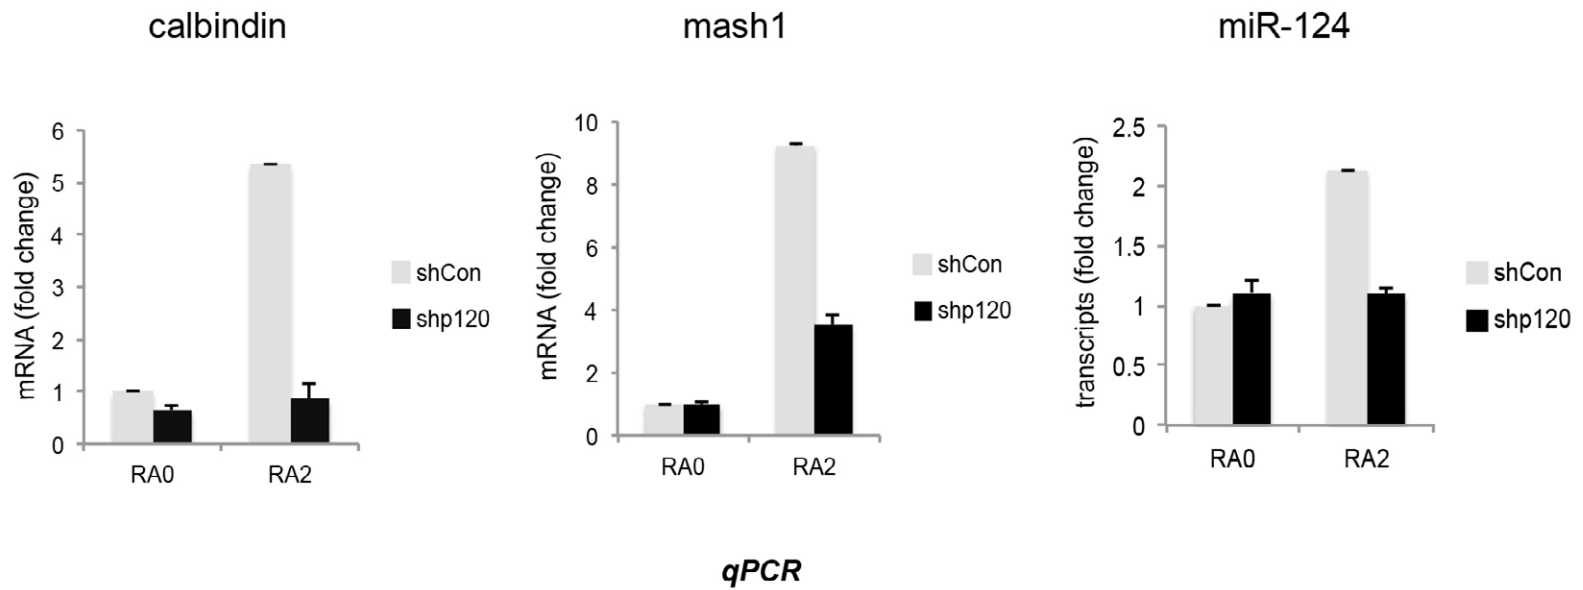



Table S1. Primer sequences.

qPCR primers

|              |                            |
|--------------|----------------------------|
| mGAPDH-F     | TCGTCCCGTAGACAAAATGG       |
| mGAPDH-R     | TTGAGGTCAATGAAGGGGTC       |
| mNeuro D1 -F | GAGGCTCCAGGGTTATGAGA       |
| mNeuro D1 -R | ACTCATCTGTCCAGCTTGGG       |
| q-mSyt4-F    | AATGAGGTGATTGGACGGTTG      |
| q-mSyt4-R    | AGTGCCCCCACC GC            |
| q-mMash1-F   | TCGTCCTCTCCGGA ACTG AT     |
| q-mMash1-R   | TAGCCGAAGCCGCTGAAG         |
| mNanog-F     | GGTTGAAGACTAGCAATGGTCTGA   |
| mNanog-R     | TCCAGATGCGTTCACCAGATAG     |
| mOct4-F      | TGCTGAAGCAGAAGAGGATCAC     |
| mOct4-R      | CAGATGGTGGTCTGGCTGAA       |
| mSox2-F      | AGATGCACA ACTCGGAGATCAG    |
| mSox2-R      | TCATGAGCGTCTTGGTTTTCC      |
| mFoxA2-F     | GGCACCTTGAGAAAGCAGTC       |
| mFoxA2-R     | GACATACCGACGCAGCTACA       |
| mSox1-F      | AGATGCACA ACTCGGAGATCAG    |
| mSox1-R      | GAGTACTTGTCTTCTTGAGCAGC    |
| miR-9-1-F    | GGGTTGGTTGTTATCTTTGGTTATC  |
| miR-9-1-R    | AGACTCCACACCACTCATA CAGC   |
| miR-124a-F   | CTCTGCGTGTTACAGCGG         |
| miR-124a-R   | CTCTTGGCATTACCGCGTG        |
| miR-132-F    | CTCCAGGGCAACCGTGGCTTTC     |
| miR-132-R    | TGGCTGTAGACTGTTACCTCCGGTTC |
| mGAD1-F      | AACAAACACGGGTGCAATTT       |
| mGAD1-R      | TCACCCTCGATTTTCAACC        |
| mSyn1-F      | CCACAGGGTATGTTGTGCTG       |



|          |                         |
|----------|-------------------------|
| mSyn1-R  | GCCCAGATGGTTCGACTACA    |
| mMap2-F  | GCTGGTGGTATGTTCTGGCT    |
| mMap2-R  | TACCGGTTCCCTCAGCTTGTC   |
| mDex-F   | TTCAGGACCACAAGCAATGA    |
| mDex-R   | GGAAACCGGAGTTGTCAAAA    |
| mBra-F   | GAGCCTCGAAAGAAGTACTGAGC |
| mBra-R   | CAGCCCACCTACTGGCTCTA    |
| mTubb3-F | AGTCCCCTACATAGTTGCCG    |
| mTubb3-R | AGTCAGCATGAGGGAGATCG    |

#### RT-PCR primers

|                 |                               |
|-----------------|-------------------------------|
| mMash1 RT-F     | GGAAGTATGCGCTGCAAACGCCG       |
| mMash1 RT-R     | GTTGGTAAAGTCCAGCAGCTCTTGTT    |
| mCalbindin RT-F | GTTTCGTGTATCCTTTAGCTAGTGTGT   |
| mCalbindin RT-R | TCTAAAGTCACTGCTTCCAAATACGTGC  |
| mSyt4 RT-F      | GGTGTGGCCAAGTTTTTCATAAGATATTC |
| mSyt4 RT-R      | GCTACCCTTCTTATGATGAGACTGTATC  |

#### ChIP-qPCR primers

|                      |                      |
|----------------------|----------------------|
| ChIP-mSyt4-3UTR-F    | CAAACAACCCCCAAAACAAC |
| ChIP-mSyt4-3UTR-R    | CAAGGAGACACAGCCTCACA |
| ChIP-mCal-3UTR-F     | GGGGAAACTGGGTAGATGGT |
| ChIP-mCal-3UTR-R     | GCCTGCCTCTGTTTTCCATA |
| ChIP-miR124a3 5UTR-F | CCCTTTCTGGAGGAATGACA |
| ChIP-miR124a3 5UTR-R | ATCAACAGAAACCCGTGGAG |
| ChIP-miR124a3-F      | ACCCCAGAGAAATGGGGTAG |
| ChIP-miR124a3-R      | AAAGTGATCACCGCCTTCAC |
| ChIP-mGAPDH-F        | CTGCAGTACTGTGGGGAGGT |
| ChIP-mGAPDH-R        | CAAAGGCGGAGTTACCAGAG |
| ChIP-mGAD1-F         | CGCACCTGCAGTGAACACC  |

|              |                       |
|--------------|-----------------------|
| ChIP-mGAD1-R | AAGACTTCAGCACCGAGGACA |
| ChIP-mSyt4-F | ACTTGCTCACCGAATTCCAC  |
| ChIP-mSyt4-R | GAAGAGCCAACAGGAACAGG  |
| ChIP-mCal-F  | CCACCTGCTGCTTCCTAGAC  |
| ChIP-mCal-R  | CCGCACCCAGTTCTCTGTAT  |

## References

- Abrajano, J. J., Qureshi, I. A., Gokhan, S., Zheng, D., Bergman, A. and Mehler, M. F.** (2009a). Differential deployment of REST and CoREST promotes glial subtype specification and oligodendrocyte lineage maturation. *PloS one* **4**, e7665.
- Abrajano, J. J., Qureshi, I. A., Gokhan, S., Zheng, D., Bergman, A. and Mehler, M. F.** (2009b). REST and CoREST modulate neuronal subtype specification, maturation and maintenance. *PloS one* **4**, e7936.
- Abu-Elneel, K., Ochiishi, T., Medina, M., Remedi, M., Gastaldi, L., Caceres, A. and Kosik, K. S.** (2008). A delta-catenin signaling pathway leading to dendritic protrusions. *The Journal of biological chemistry* **283**, 32781-91.
- Andres, M. E., Burger, C., Peral-Rubio, M. J., Battaglioli, E., Anderson, M. E., Grimes, J., Dallman, J., Ballas, N. and Mandel, G.** (1999). CoREST: a functional corepressor required for regulation of neural-specific gene expression. *Proceedings of the National Academy of Sciences of the United States of America* **96**, 9873-8.
- Aoki, H., Hara, A., Era, T., Kunisada, T. and Yamada, Y.** (2012). Genetic ablation of Rest leads to in vitro-specific derepression of neuronal genes during neurogenesis. *Development* **139**, 667-77.
- Arikkath, J., Peng, I. F., Ng, Y. G., Israely, I., Liu, X., Ullian, E. M. and Reichardt, L. F.** (2009). Delta-catenin regulates spine and synapse morphogenesis and function in hippocampal neurons during development. *The Journal of neuroscience : the official journal of the Society for Neuroscience* **29**, 5435-42.
- Ballas, N., Battaglioli, E., Atouf, F., Andres, M. E., Chenoweth, J., Anderson, M. E., Burger, C., Moniwa, M., Davie, J. R., Bowers, W. J. et al.** (2001). Regulation of neuronal traits by a novel transcriptional complex. *Neuron* **31**, 353-65.
- Ballas, N., Grunseich, C., Lu, D. D., Speh, J. C. and Mandel, G.** (2005). REST and its corepressors mediate plasticity of neuronal gene chromatin throughout neurogenesis. *Cell* **121**, 645-57.
- Battaglioli, E., Andres, M. E., Rose, D. W., Chenoweth, J. G., Rosenfeld, M. G., Anderson, M. E. and Mandel, G.** (2002). REST repression of neuronal genes requires components of the hSWI.SNF complex. *The Journal of biological chemistry* **277**, 41038-45.
- Bellovin, D. I., Bates, R. C., Muzikansky, A., Rimm, D. L. and Mercurio, A. M.** (2005). Altered localization of p120 catenin during epithelial to mesenchymal transition of colon carcinoma is prognostic for aggressive disease. *Cancer research* **65**, 10938-45.
- Boggetti, B. and Niessen, C. M.** (2012). Adherens junctions in mammalian development, homeostasis and disease: lessons from mice. *Sub-cellular biochemistry* **60**, 321-55.
- Bruses, J. L.** (2006). N-cadherin signaling in synapse formation and neuronal physiology. *Molecular neurobiology* **33**, 237-52.
- Buckley, N. J., Johnson, R., Sun, Y. M. and Stanton, L. W.** (2009). Is REST a regulator of pluripotency? *Nature* **457**, E5-6; discussion E7.
- Canzonetta, C., Mulligan, C., Deutsch, S., Ruf, S., O'Doherty, A., Lyle, R., Borel, C., Lin-Marq, N., Delom, F., Groet, J. et al.** (2008). DYRK1A-dosage imbalance perturbs NRSF/REST levels, deregulating pluripotency and embryonic stem cell fate in Down syndrome. *American journal of human genetics* **83**, 388-400.

**Chen, T., Yuan, D., Wei, B., Jiang, J., Kang, J., Ling, K., Gu, Y., Li, J., Xiao, L. and Pei, G.** (2010). E-cadherin-mediated cell-cell contact is critical for induced pluripotent stem cell generation. *Stem cells* **28**, 1315-25.

**Chen, Z. F., Paquette, A. J. and Anderson, D. J.** (1998). NRSF/REST is required in vivo for repression of multiple neuronal target genes during embryogenesis. *Nature genetics* **20**, 136-42.

**Cho, K., Vaught, T. G., Ji, H., Gu, D., Papasakelariou-Yared, C., Horstmann, N., Jennings, J. M., Lee, M., Sevilla, L. M., Kloc, M. et al.** (2010). Xenopus Kazrin interacts with ARVCF-catenin, spectrin and p190B RhoGAP, and modulates RhoA activity and epithelial integrity. *Journal of cell science* **123**, 4128-44.

**Conti, L., Crisafulli, L., Caldera, V., Tortoreto, M., Brilli, E., Conforti, P., Zunino, F., Magrassi, L., Schiffer, D. and Cattaneo, E.** (2012). REST controls self-renewal and tumorigenic competence of human glioblastoma cells. *PloS one* **7**, e38486.

**Crawford, H. C., Fingleton, B. M., Rudolph-Owen, L. A., Goss, K. J., Rubinfeld, B., Polakis, P. and Matrisian, L. M.** (1999). The metalloproteinase matrilysin is a target of beta-catenin transactivation in intestinal tumors. *Oncogene* **18**, 2883-91.

**Daniel, J. M. and Reynolds, A. B.** (1995). The tyrosine kinase substrate p120cas binds directly to E-cadherin but not to the adenomatous polyposis coli protein or alpha-catenin. *Molecular and cellular biology* **15**, 4819-24.

**Daniel, J. M. and Reynolds, A. B.** (1999). The catenin p120(ctn) interacts with Kaiso, a novel BTB/POZ domain zinc finger transcription factor. *Molecular and cellular biology* **19**, 3614-23.

**Daniel, J. M., Spring, C. M., Crawford, H. C., Reynolds, A. B. and Baig, A.** (2002). The p120(ctn)-binding partner Kaiso is a bi-modal DNA-binding protein that recognizes both a sequence-specific consensus and methylated CpG dinucleotides. *Nucleic acids research* **30**, 2911-9.

**Davis, M. A., Ireton, R. C. and Reynolds, A. B.** (2003). A core function for p120-catenin in cadherin turnover. *The Journal of cell biology* **163**, 525-34.

**Elia, L. P., Yamamoto, M., Zang, K. and Reichardt, L. F.** (2006). p120 catenin regulates dendritic spine and synapse development through Rho-family GTPases and cadherins. *Neuron* **51**, 43-56.

**Fang, X., Ji, H., Kim, S. W., Park, J. I., Vaught, T. G., Anastasiadis, P. Z., Ciesiolka, M. and McCrea, P. D.** (2004). Vertebrate development requires ARVCF and p120 catenins and their interplay with RhoA and Rac. *The Journal of cell biology* **165**, 87-98.

**Fraichard, A., Chassande, O., Bilbaut, G., Dehay, C., Savatier, P. and Samarut, J.** (1995). In vitro differentiation of embryonic stem cells into glial cells and functional neurons. *Journal of cell science* **108 ( Pt 10)**, 3181-8.

**Gao, Z., Ure, K., Ding, P., Nashaat, M., Yuan, L., Ma, J., Hammer, R. E. and Hsieh, J.** (2011). The master negative regulator REST/NRSF controls adult neurogenesis by restraining the neurogenic program in quiescent stem cells. *The Journal of neuroscience : the official journal of the Society for Neuroscience* **31**, 9772-86.

**Gopalakrishnan, V.** (2009). REST and the RESTless: in stem cells and beyond. *Future neurology* **4**, 317-329.

**Gordon, M. D. and Nusse, R.** (2006). Wnt signaling: multiple pathways, multiple receptors, and multiple transcription factors. *The Journal of biological chemistry* **281**, 22429-33.

- Gottardi, C. J. and Peifer, M.** (2008). Terminal regions of beta-catenin come into view. *Structure* **16**, 336-8.
- Groot, K. R., Sevilla, L. M., Nishi, K., DiColandrea, T. and Watt, F. M.** (2004). Kazrin, a novel periplakin-interacting protein associated with desmosomes and the keratinocyte plasma membrane. *The Journal of cell biology* **166**, 653-9.
- Gu, D., Tonthat, N. K., Lee, M., Ji, H., Bhat, K. P., Hollingsworth, F., Aldape, K. D., Schumacher, M. A., Zwaka, T. P. and McCrea, P. D.** (2011). Caspase-3 cleavage links delta-catenin to the novel nuclear protein ZIFCAT. *The Journal of biological chemistry* **286**, 23178-88.
- Hatzfeld, M.** (2005). The p120 family of cell adhesion molecules. *European journal of cell biology* **84**, 205-14.
- Hirai, H., Karian, P. and Kikyo, N.** (2011). Regulation of embryonic stem cell self-renewal and pluripotency by leukaemia inhibitory factor. *The Biochemical journal* **438**, 11-23.
- Ho, C., Zhou, J., Medina, M., Goto, T., Jacobson, M., Bhide, P. G. and Kosik, K. S.** (2000). delta-catenin is a nervous system-specific adherens junction protein which undergoes dynamic relocalization during development. *The Journal of comparative neurology* **420**, 261-76.
- Hong, J. Y., Park, J. I., Cho, K., Gu, D., Ji, H., Artandi, S. E. and McCrea, P. D.** (2010). Shared molecular mechanisms regulate multiple catenin proteins: canonical Wnt signals and components modulate p120-catenin isoform-1 and additional p120 subfamily members. *Journal of cell science* **123**, 4351-65.
- Hong, J. Y., Park, J. I., Lee, M., Munoz, W. A., Miller, R. K., Ji, H., Gu, D., Ezan, J., Sokol, S. Y. and McCrea, P. D.** (2012). Down's-syndrome-related kinase Dyrk1A modulates the p120-catenin-Kaiso trajectory of the Wnt signaling pathway. *Journal of cell science* **125**, 561-9.
- Hosking, C. R., Ulloa, F., Hogan, C., Ferber, E. C., Figueroa, A., Gevaert, K., Birchmeier, W., Briscoe, J. and Fujita, Y.** (2007). The transcriptional repressor Glis2 is a novel binding partner for p120 catenin. *Molecular biology of the cell* **18**, 1918-27.
- Humphries, M. J. and Reynolds, A.** (2009). Cell-to-cell contact and extracellular matrix. *Current opinion in cell biology* **21**, 613-5.
- Ireton, R. C., Davis, M. A., van Hengel, J., Mariner, D. J., Barnes, K., Thoreson, M. A., Anastasiadis, P. Z., Matrisian, L., Bundy, L. M., Sealy, L. et al.** (2002). A novel role for p120 catenin in E-cadherin function. *The Journal of cell biology* **159**, 465-76.
- Ishiyama, N., Lee, S. H., Liu, S., Li, G. Y., Smith, M. J., Reichardt, L. F. and Ikura, M.** (2010). Dynamic and static interactions between p120 catenin and E-cadherin regulate the stability of cell-cell adhesion. *Cell* **141**, 117-28.
- Jorgensen, H. F., Chen, Z. F., Merkschlager, M. and Fisher, A. G.** (2009a). Is REST required for ESC pluripotency? *Nature* **457**, E4-5; discussion E7.
- Jorgensen, H. F. and Fisher, A. G.** (2010). Can controversies be put to REST? *Nature* **467**, E3-4; discussion E5.
- Jorgensen, H. F., Terry, A., Beretta, C., Pereira, C. F., Leleu, M., Chen, Z. F., Kelly, C., Merkschlager, M. and Fisher, A. G.** (2009b). REST selectively represses a subset of RE1-containing neuronal genes in mouse embryonic stem cells. *Development* **136**, 715-21.
- Kamal, M. M., Sathyan, P., Singh, S. K., Zinn, P. O., Marisetty, A. L., Liang, S., Gumin, J., El-Mesallamy, H. O., Suki, D., Colman, H. et al.** (2012). REST regulates oncogenic properties of glioblastoma stem cells. *Stem cells* **30**, 405-14.

**Kelly, K. F., Spring, C. M., Otchere, A. A. and Daniel, J. M.** (2004). NLS-dependent nuclear localization of p120ctn is necessary to relieve Kaiso-mediated transcriptional repression. *Journal of cell science* **117**, 2675-86.

**Kim, S. W., Park, J. I., Spring, C. M., Sater, A. K., Ji, H., Otchere, A. A., Daniel, J. M. and McCrea, P. D.** (2004). Non-canonical Wnt signals are modulated by the Kaiso transcriptional repressor and p120-catenin. *Nature cell biology* **6**, 1212-20.

**Kosik, K. S., Donahue, C. P., Israely, I., Liu, X. and Ochiishi, T.** (2005). Delta-catenin at the synaptic-adherens junction. *Trends in cell biology* **15**, 172-8.

**Kuroda, T., Tada, M., Kubota, H., Kimura, H., Hatano, S. Y., Suemori, H., Nakatsuji, N. and Tada, T.** (2005). Octamer and Sox elements are required for transcriptional cis regulation of Nanog gene expression. *Molecular and cellular biology* **25**, 2475-85.

**Kuwabara, T., Hsieh, J., Nakashima, K., Taira, K. and Gage, F. H.** (2004). A small modulatory dsRNA specifies the fate of adult neural stem cells. *Cell* **116**, 779-93.

**Li, D., Zhou, J., Wang, L., Shin, M. E., Su, P., Lei, X., Kuang, H., Guo, W., Yang, H., Cheng, L. et al.** (2010a). Integrated biochemical and mechanical signals regulate multifaceted human embryonic stem cell functions. *The Journal of cell biology* **191**, 631-44.

**Li, L., Wang, B. H., Wang, S., Moalim-Nour, L., Mohib, K., Lohnes, D. and Wang, L.** (2010b). Individual cell movement, asymmetric colony expansion, rho-associated kinase, and E-cadherin impact the clonogenicity of human embryonic stem cells. *Biophysical journal* **98**, 2442-51.

**MacDonald, B. T., Tamai, K. and He, X.** (2009). Wnt/beta-catenin signaling: components, mechanisms, and diseases. *Developmental cell* **17**, 9-26.

**Mao, C. A., Tsai, W. W., Cho, J. H., Pan, P., Barton, M. C. and Klein, W. H.** (2011). Neuronal transcriptional repressor REST suppresses an Atoh7-independent program for initiating retinal ganglion cell development. *Developmental biology* **349**, 90-9.

**Matter, C., Pribadi, M., Liu, X. and Trachtenberg, J. T.** (2009). Delta-catenin is required for the maintenance of neural structure and function in mature cortex in vivo. *Neuron* **64**, 320-7.

**McCrea, P. D. and Park, J. I.** (2007). Developmental functions of the P120-catenin subfamily. *Biochimica et biophysica acta* **1773**, 17-33.

**McEwen, A. E., Escobar, D. E. and Gottardi, C. J.** (2012). Signaling from the adherens junction. *Sub-cellular biochemistry* **60**, 171-96.

**McMahon, A. P. and Bradley, A.** (1990). The Wnt-1 (int-1) proto-oncogene is required for development of a large region of the mouse brain. *Cell* **62**, 1073-85.

**Miller, R. K., Hong, J. Y., Munoz, W. A. and McCrea, P. D.** (2013). Beta-catenin versus the other armadillo catenins: assessing our current view of canonical Wnt signaling. *Progress in molecular biology and translational science* **116**, 387-407.

**Mohamet, L., Lea, M. L. and Ward, C. M.** (2010). Abrogation of E-cadherin-mediated cellular aggregation allows proliferation of pluripotent mouse embryonic stem cells in shake flask bioreactors. *PloS one* **5**, e12921.

**Nusse, R.** (2008). Wnt signaling and stem cell control. *Cell research* **18**, 523-7.

**Olguin, P., Oteiza, P., Gamboa, E., Gomez-Skarmeta, J. L. and Kukuljan, M.** (2006). RE-1 silencer of transcription/neural restrictive silencer factor modulates ectodermal patterning during Xenopus development. *The Journal of neuroscience : the official journal of the Society for Neuroscience* **26**, 2820-9.



- Otto, S. J., McCorkle, S. R., Hover, J., Conaco, C., Han, J. J., Impey, S., Yochum, G. S., Dunn, J. J., Goodman, R. H. and Mandel, G.** (2007). A new binding motif for the transcriptional repressor REST uncovers large gene networks devoted to neuronal functions. *The Journal of neuroscience : the official journal of the Society for Neuroscience* **27**, 6729-39.
- Paffenholz, R. and Franke, W. W.** (1997). Identification and localization of a neurally expressed member of the plakoglobin/armadillo multigene family. *Differentiation; research in biological diversity* **61**, 293-304.
- Park, J. I., Kim, S. W., Lyons, J. P., Ji, H., Nguyen, T. T., Cho, K., Barton, M. C., Deroo, T., Vleminckx, K., Moon, R. T. et al.** (2005). Kaiso/p120-catenin and TCF/beta-catenin complexes coordinately regulate canonical Wnt gene targets. *Developmental cell* **8**, 843-54.
- Pieters, T., van Hengel, J. and van Roy, F.** (2012a). Functions of p120ctn in development and disease. *Frontiers in bioscience* **17**, 760-83.
- Pieters, T. and van Roy, F.** (2014). Role of cell-cell adhesion complexes in embryonic stem cell biology. *Journal of cell science* **127**, 2603-13.
- Pieters, T., van Roy, F. and van Hengel, J.** (2012b). Functions of p120ctn isoforms in cell-cell adhesion and intracellular signaling. *Frontiers in bioscience* **17**, 1669-94.
- Qureshi, I. A., Gokhan, S. and Mehler, M. F.** (2010). REST and CoREST are transcriptional and epigenetic regulators of seminal neural fate decisions. *Cell cycle* **9**, 4477-86.
- Ratheesh, A., Priya, R. and Yap, A. S.** (2013). Coordinating Rho and Rac: the regulation of Rho GTPase signaling and cadherin junctions. *Progress in molecular biology and translational science* **116**, 49-68.
- Redmer, T., Diecke, S., Grigoryan, T., Quiroga-Negreira, A., Birchmeier, W. and Besser, D.** (2011). E-cadherin is crucial for embryonic stem cell pluripotency and can replace OCT4 during somatic cell reprogramming. *EMBO reports* **12**, 720-6.
- Reynolds, A. B.** (2007). p120-catenin: Past and present. *Biochimica et biophysica acta* **1773**, 2-7.
- Reynolds, A. B., Daniel, J., McCrea, P. D., Wheelock, M. J., Wu, J. and Zhang, Z.** (1994). Identification of a new catenin: the tyrosine kinase substrate p120cas associates with E-cadherin complexes. *Molecular and cellular biology* **14**, 8333-42.
- Rodda, D. J., Chew, J. L., Lim, L. H., Loh, Y. H., Wang, B., Ng, H. H. and Robson, P.** (2005). Transcriptional regulation of nanog by OCT4 and SOX2. *The Journal of biological chemistry* **280**, 24731-7.
- Rossbach, M.** (2011). Non-Coding RNAs in Neural Networks, REST-Assured. *Frontiers in genetics* **2**, 8.
- Schackmann, R. C., van Amersfoort, M., Haarhuis, J. H., Vlug, E. J., Halim, V. A., Roodhart, J. M., Vermaat, J. S., Voest, E. E., van der Groep, P., van Diest, P. J. et al.** (2011). Cytosolic p120-catenin regulates growth of metastatic lobular carcinoma through Rock1-mediated anoikis resistance. *The Journal of clinical investigation* **121**, 3176-88.
- Schreiber, E., Matthias, P., Muller, M. M. and Schaffner, W.** (1989). Rapid detection of octamer binding proteins with 'mini-extracts', prepared from a small number of cells. *Nucleic acids research* **17**, 6419.
- Sevilla, L. M., Nachat, R., Groot, K. R. and Watt, F. M.** (2008). Kazrin regulates keratinocyte cytoskeletal networks, intercellular junctions and differentiation. *Journal of cell science* **121**, 3561-9.



- Shibata, T., Kokubu, A., Sekine, S., Kanai, Y. and Hirohashi, S.** (2004). Cytoplasmic p120<sup>ctn</sup> regulates the invasive phenotypes of E-cadherin-deficient breast cancer. *The American journal of pathology* **164**, 2269-78.
- Singh, S. K., Kagalwala, M. N., Parker-Thornburg, J., Adams, H. and Majumder, S.** (2008). REST maintains self-renewal and pluripotency of embryonic stem cells. *Nature* **453**, 223-7.
- Sokol, S. Y.** (2011). Maintaining embryonic stem cell pluripotency with Wnt signaling. *Development* **138**, 4341-50.
- Soncin, F., Mohamet, L., Eckardt, D., Ritson, S., Eastham, A. M., Bobola, N., Russell, A., Davies, S., Kemler, R., Merry, C. L. et al.** (2009). Abrogation of E-cadherin-mediated cell-cell contact in mouse embryonic stem cells results in reversible LIF-independent self-renewal. *Stem cells* **27**, 2069-80.
- Spring, C. M., Kelly, K. F., O'Kelly, I., Graham, M., Crawford, H. C. and Daniel, J. M.** (2005). The catenin p120<sup>ctn</sup> inhibits Kaiso-mediated transcriptional repression of the beta-catenin/TCF target gene matrilysin. *Experimental cell research* **305**, 253-65.
- Stemmler, M. P.** (2008). Cadherins in development and cancer. *Molecular bioSystems* **4**, 835-50.
- Stepniak, E., Radice, G. L. and Vasioukhin, V.** (2009). Adhesive and signaling functions of cadherins and catenins in vertebrate development. *Cold Spring Harbor perspectives in biology* **1**, a002949.
- Su, X., Kameoka, S., Lentz, S. and Majumder, S.** (2004). Activation of REST/NRSF target genes in neural stem cells is sufficient to cause neuronal differentiation. *Molecular and cellular biology* **24**, 8018-25.
- Sun, Y. M., Cooper, M., Finch, S., Lin, H. H., Chen, Z. F., Williams, B. P. and Buckley, N. J.** (2008). Rest-mediated regulation of extracellular matrix is crucial for neural development. *PloS one* **3**, e3656.
- Sun, Y. M., Greenway, D. J., Johnson, R., Street, M., Belyaev, N. D., Deuchars, J., Bee, T., Wilde, S. and Buckley, N. J.** (2005). Distinct profiles of REST interactions with its target genes at different stages of neuronal development. *Molecular biology of the cell* **16**, 5630-8.
- Takeichi, M.** (2007). The cadherin superfamily in neuronal connections and interactions. *Nature reviews. Neuroscience* **8**, 11-20.
- Van den Bossche, J., Malissen, B., Mantovani, A., De Baetselier, P. and Van Ginderachter, J. A.** (2012). Regulation and function of the E-cadherin/catenin complex in cells of the monocyte-macrophage lineage and DCs. *Blood* **119**, 1623-33.
- Wagoner, M. P. and Roopra, A.** (2012). A REST derived gene signature stratifies glioblastomas into chemotherapy resistant and responsive disease. *BMC genomics* **13**, 686.
- Westbrook, T. F., Hu, G., Ang, X. L., Mulligan, P., Pavlova, N. N., Liang, A., Leng, Y., Maehr, R., Shi, Y., Harper, J. W. et al.** (2008). SCF<sup>beta</sup>-TRCP controls oncogenic transformation and neural differentiation through REST degradation. *Nature* **452**, 370-4.
- Yamada, Y., Aoki, H., Kunisada, T. and Hara, A.** (2010). Rest promotes the early differentiation of mouse ESCs but is not required for their maintenance. *Cell stem cell* **6**, 10-5.
- Ying, Q. L., Stavridis, M., Griffiths, D., Li, M. and Smith, A.** (2003). Conversion of embryonic stem cells into neuroectodermal precursors in adherent monoculture. *Nature biotechnology* **21**, 183-6.

**Yoon, H. G., Chan, D. W., Reynolds, A. B., Qin, J. and Wong, J.** (2003). N-CoR mediates DNA methylation-dependent repression through a methyl CpG binding protein Kaiso. *Molecular cell* **12**, 723-34.

**You, A., Tong, J. K., Grozinger, C. M. and Schreiber, S. L.** (2001). CoREST is an integral component of the CoREST- human histone deacetylase complex. *Proceedings of the National Academy of Sciences of the United States of America* **98**, 1454-8.

**Young, R. A.** (2011). Control of the embryonic stem cell state. *Cell* **144**, 940-54.

**Zhou, J., Liyanage, U., Medina, M., Ho, C., Simmons, A. D., Lovett, M. and Kosik, K. S.** (1997). Presenilin 1 interaction in the brain with a novel member of the Armadillo family. *Neuroreport* **8**, 2085-90.
